# Supplementary material
Source: PubMed Central journal article supplement (PMC5971563)
Supplement: AAC.02656-17_zac006187220s1.pdf [file AAC.02656-17_zac006187220s1.pdf]

**Alterations of metabolic and lipid profiles in polymyxin-resistant *Pseudomonas aeruginosa***

Mei-Ling Han<sup>1,2</sup>, Yan Zhu<sup>2</sup>, Darren J. Creek<sup>1</sup>, Yu-Wei Lin<sup>3</sup>, Dovile Anderson<sup>1</sup>, Hsin-Hui Shen<sup>4</sup>, Brian Tsuji<sup>5</sup>, Alina D. Gutu<sup>6</sup>, Samuel M. Moskowitz<sup>7</sup>, Tony Velkov<sup>1,8\*</sup>, Jian Li<sup>2\*</sup>

<sup>1</sup>Drug Delivery, Disposition and Dynamics. Monash Institute of Pharmaceutical Sciences, Monash University, 381 Royal Parade, Parkville 3052, Victoria, Australia.

<sup>2</sup>Monash Biomedicine Discovery Institute, Department of Microbiology, Monash University, Clayton, Victoria 3800, Australia.

<sup>3</sup>Advanced Drug Delivery Group, Faculty of Pharmacy, The University of Sydney, Sydney, New South Wales 2006, Australia.

<sup>4</sup>Department of Materials Science and Engineering, Faculty of Engineering, Monash University, Clayton, Victoria 3800, Australia.

<sup>5</sup>Department of Pharmacy Practice, University at Buffalo, Buffalo, NY, USA.

<sup>6</sup>Department of Molecular Biology, Massachusetts General Hospital, Boston, Massachusetts, USA.

<sup>7</sup>Vertex Pharmaceuticals, Boston, MA, USA.

<sup>8</sup>Department of Pharmacology & Therapeutics, School of Biomedical Sciences, Faculty of Medicine, Dentistry and Health Sciences, The University of Melbourne, Parkville, VIC, 3010, Australia.

\*Joint corresponding authors: Tony Velkov, telephone: +61 3 8344 9846, email: Tony.Velkov@unimelb.edu.au; Jian Li, telephone: +61 3 9903 9702, fax: +61 3 9902 9222, email: Jian.Li@monash.edu.

**Figure S1**

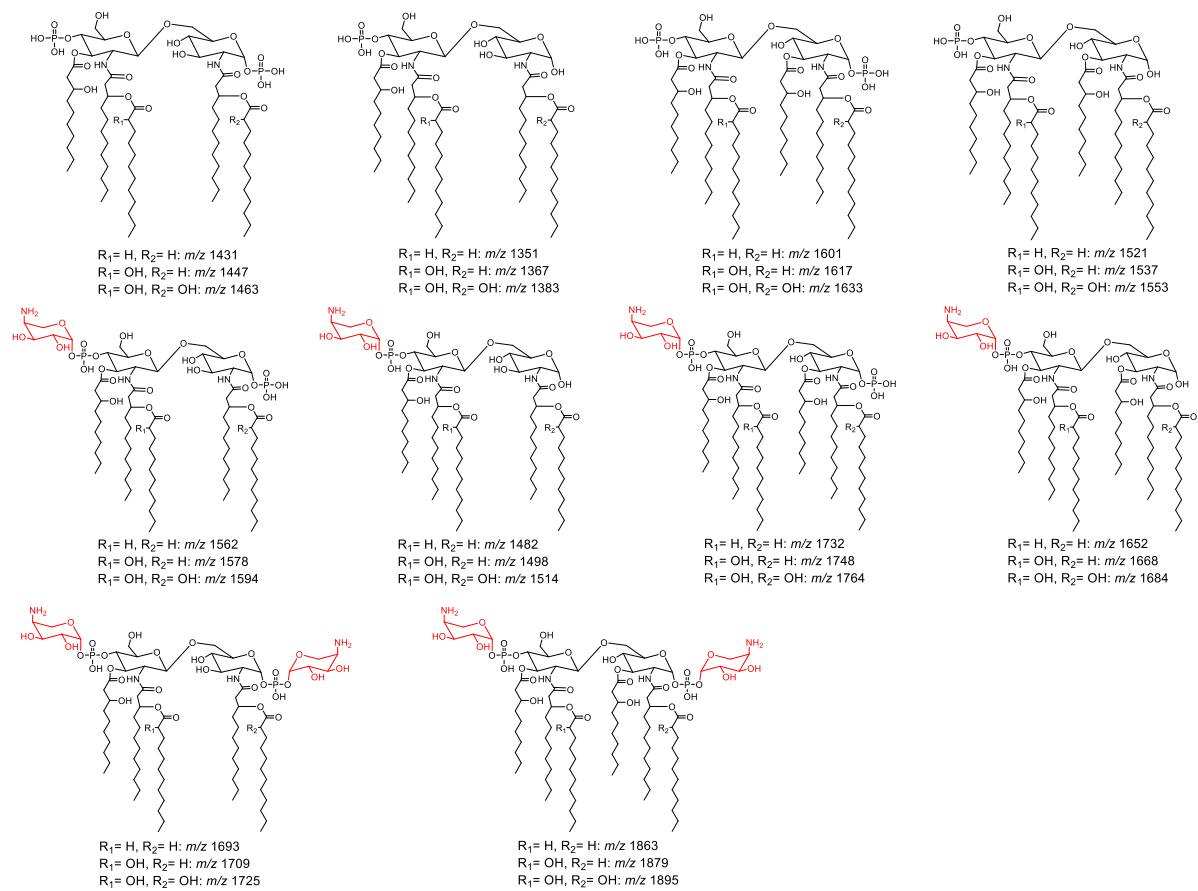

**Figure S1. Structures of wild-type lipid A presented in PAK and L-Ara4N modified lipid A in PAK*pmrB6* and PAK*pmrB12*. L-Ara4N moiety is highlighted in red.**

**Figure S2**

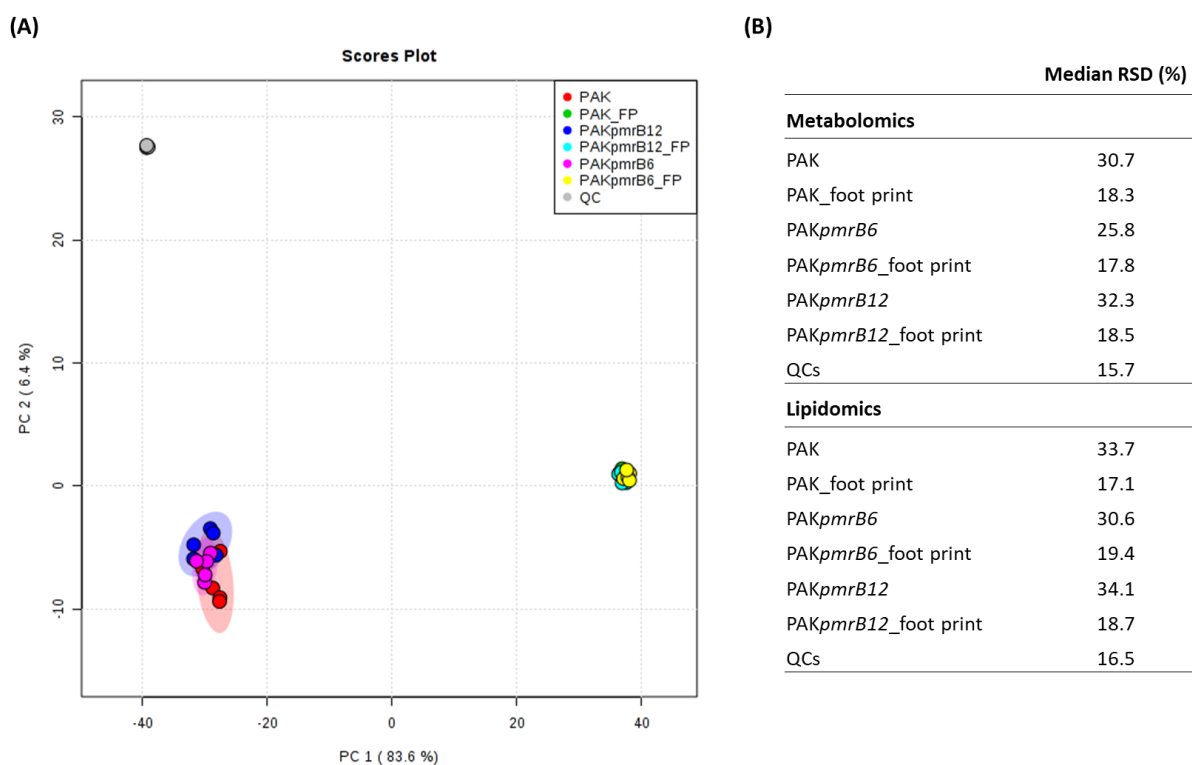

**Figure S2. (A) PCA score plot of all metabolites from the finger print (intracellular metabolite samples) and foot print (extracellular metabolite samples) of PAK, PAKpmrB6 and PAKpmrB12. (B) Data precision of individual samples represented as the median relative standard deviation (RSD) for all metabolites based on all replicates of each group. Four quality controls (QCs) were analyzed throughout the LC-MS batch. Each dataset represents five biological replicates of finger-printing samples and three biological replicates of foot-printing samples.**

**Figure S3**

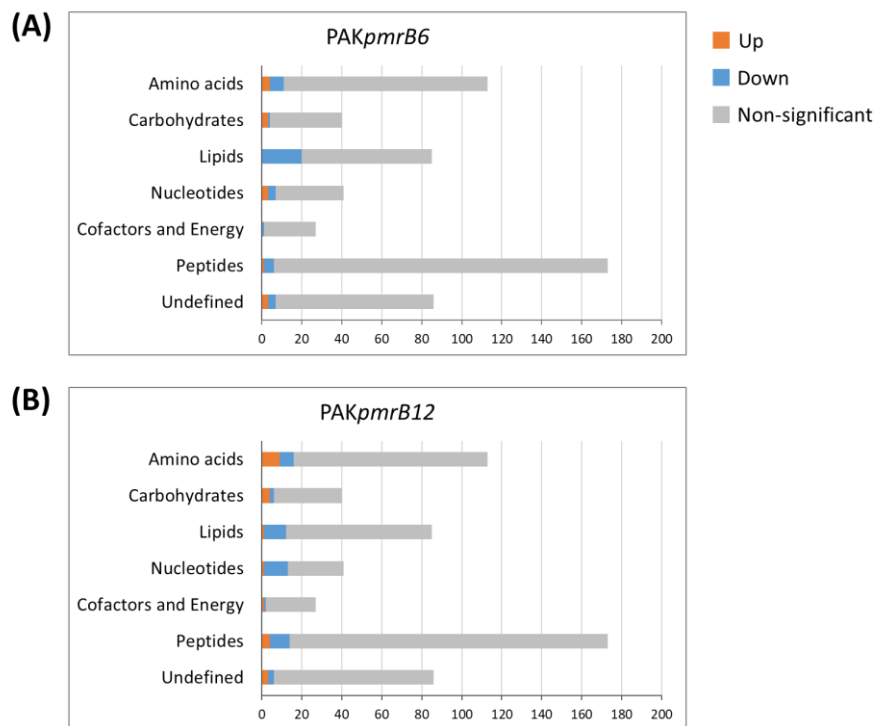

**Figure S3. Summary number of significant metabolic changes classified according to different metabolite classes in PAKpmrB6 (A) and PAKpmrB12 (B) compared to the wild-type PAK strain. Fold changes  $\geq 1\text{-log}_2\text{-fold}$ ,  $p \leq 0.05$ , FDR  $\leq 0.05$  (one-way ANOVA for multiple comparison).**
